# Supplementary material for: Mycotoxins in Wheat Flours Marketed in Shanghai, China: Occurrence and Dietary Risk Assessment
Source: MDPI journal article supplement (doi:10.3390/toxins14110748), 2022-10-31
Supplement: s1 [file s1]

# Supplementary Materials: Mycotoxins in Wheat Flours Marketed in Shanghai, China: Occurrence and Dietary Risk Assessment

Haiyan Zhou, Anqi Xu, Meichen Liu, Zheng Yan, Luxin Qin, Hong Liu, Aibo Wu and Na Liu

**Table S1.** Different combinations of co-occurrence of mycotoxins in wheat flours marketed in China.

| N                                    | Incidence | Frequency (%) | N                                            | Incidence | Frequency (%) |
|--------------------------------------|-----------|---------------|----------------------------------------------|-----------|---------------|
| 2                                    |           |               | 4                                            |           |               |
| D <sub>3</sub> G+DON                 | 2         | 0.67          | NIV+AOH+ZEN+3-AcDON                          | 1         | 0.33          |
| DON+TEA                              | 7         | 2.34          | NIV+AOH+ZEN+15-AcDON                         | 1         | 0.33          |
| 15-AcDON+TEA                         | 2         | 0.67          | DON+TEA+TEN+FUS-X                            | 2         | 0.67          |
| DON+15-AcDON                         | 2         | 0.67          | DON+FUS-X+AOH+ZEN                            | 1         | 0.33          |
| DON+FUS-X                            | 1         | 0.33          | 15-AcDON+D <sub>3</sub> G+AOH+ZEN            | 2         | 0.67          |
| TEA+ZEA                              | 2         | 0.67          | FUS-X+D <sub>3</sub> G+AOH+ZEN               | 1         | 0.33          |
| AOH+ZEN                              | 15        | 5.02          | FUS+15-AcDON +AOH+ZEN                        | 1         | 0.33          |
| 3                                    |           |               | 15-AcDON +AOH+ZEN+OTA                        | 1         | 0.33          |
| DON+15-AcDON +TEA                    | 5         | 1.67          | DON+AOH+TEN+TEA                              | 1         | 0.33          |
| DON+15-AcDON +FUS-X                  | 1         | 0.33          | DON+AOH+TEN+ZEN                              | 1         | 0.33          |
| DON+15-AcDON +TEN                    | 1         | 0.33          | 5                                            |           |               |
| DON+TEA+FUS-X                        | 1         | 0.33          | DON+15-AcDON +D <sub>3</sub> G+TEA+ZEN       | 5         | 1.67          |
| DON+TEA+TEN                          | 25        | 8.36          | DON+15-AcDON +D <sub>3</sub> G+TEA+NEO       | 1         | 0.33          |
| DON+TEA+D <sub>3</sub> G             | 1         | 0.33          | DON+15-AcDON +D <sub>3</sub> G+TEA+TEN       | 3         | 1.00          |
| DON+TEA+OTA                          | 1         | 0.33          | DON+15-AcDON +D <sub>3</sub> G+AOH+ZEN       | 1         | 0.33          |
| DON+TEA+ZEN                          | 3         | 1.00          | DON+15-AcDON +FUS-X+TEA+TEN                  | 5         | 1.67          |
| DON+D <sub>3</sub> G+ZEN             | 4         | 1.34          | DON+15-AcDON +TEA+TEN+ZEN                    | 2         | 0.67          |
| DON+AOH+TEN                          | 1         | 0.33          | DON+15-AcDON +TEA+TEN+AOH                    | 2         | 0.67          |
| DON+FUS-X+ZEN                        | 1         | 0.33          | DON+15-AcDON +TEA+TEN+NEO                    | 2         | 0.67          |
| AOH+D <sub>3</sub> G+ZEN             | 6         | 2.01          | NIV+DON+15-AcDON +TEA+TEN                    | 1         | 0.33          |
| NIV+AOH+ZEN                          | 2         | 0.67          | DON+15-AcDON +3-AcDON+TEA+TEN                | 1         | 0.33          |
| NIV+TEA+ZEN                          | 1         | 0.33          | DON+15-AcDON +3-AcDON+TEA+ZEN                | 1         | 0.33          |
| 15-AcDON +D <sub>3</sub> G+TEA       | 1         | 0.33          | DON+15-AcDON+TEA+FB <sub>1</sub> +ZEN        | 1         | 0.33          |
| 15-AcDON +TEA+TEN                    | 1         | 0.33          | NIV+DON+D <sub>3</sub> G+TEA+TEN             | 15        | 5.02          |
| 15-AcDON +TEA+ZEN                    | 2         | 0.67          | NIV+DON+TEA+TEN+FB <sub>1</sub>              | 1         | 0.33          |
| 15-AcDON +AOH+ZEN                    | 1         | 0.33          | DON+D <sub>3</sub> G+TEA+TEN+ZEN             | 7         | 2.34          |
| AOH+TEA+ZEN                          | 2         | 0.67          | DON+D <sub>3</sub> G+FUS-X+TEA+TEN           | 1         | 0.33          |
| FUS-X+AOH+ZEN                        | 1         | 0.33          | DON+FUS-X+TEA+TEN+ZEN                        | 1         | 0.33          |
| D <sub>3</sub> G+OTA+ZEN             | 1         | 0.33          | DON+3Ac-DON+TEA+TEN+ZEN                      | 1         | 0.33          |
| AOH+TEN+ZEN                          | 1         | 0.33          | NIV+DON+FUS-X+AOH+ZEN                        | 1         | 0.33          |
| 4                                    |           |               | 15-AcDON+TEN+TEA+OTA+NEO                     | 1         | 0.33          |
| DON+15-AcDON +D <sub>3</sub> G+FUS-X | 2         | 0.67          | FUS-X+TEN+TEA+ZEN+OTA                        | 1         | 0.33          |
| DON+15-AcDON +D <sub>3</sub> G+TEA   | 5         | 1.67          | 15-AcDON +FUS-X+AOH+OTA+ZEN                  | 1         | 0.33          |
| DON+15-AcDON +D <sub>3</sub> G+ZEN   | 2         | 0.67          | 6                                            |           |               |
| DON+15-AcDON +D <sub>3</sub> G+TEN   | 1         | 0.33          | DON+15-AcDON +FUS-X+TEN+TEA+D <sub>3</sub> G | 1         | 0.33          |
| DON+15-AcDON +TEA+TEN                | 36        | 12.04         | DON+15-AcDON +FUS-X+TEN+TEA+NEO              | 1         | 0.33          |
| DON+15-AcDON +TEA+ZEN                | 3         | 1.00          | DON+15-AcDON +FUS-X+TEN+TEA+NIV              | 1         | 0.33          |

|                                   |    |      |                                                           |   |      |
|-----------------------------------|----|------|-----------------------------------------------------------|---|------|
| DON+15-AcDON +TEA+NEO             | 1  | 0.33 | DON+15-AcDON +FUS-X+TEN+TEA+AOH                           | 1 | 0.33 |
| DON+15-AcDON +TEN+OTA             | 1  | 0.33 | NIV+DON+D <sub>3</sub> G+TEN+TEA+ZEN                      | 2 | 0.67 |
| NIV+DON+15-AcDON +TEN             | 1  | 0.33 | DON+D <sub>3</sub> G+3-AcDON+TEN+TEA+ZEN                  | 1 | 0.33 |
| DON+TEA+TEN+ZEN                   | 8  | 2.68 | DON+D <sub>3</sub> G+15-AcDON +TEN+TEA+ZEN                | 1 | 0.33 |
| DON+D <sub>3</sub> G+TEA+TEN      | 12 | 4.01 | DON+3-AcDON +FUS-X+TEN+TEA+ZEN                            | 1 | 0.33 |
| DON+D <sub>3</sub> G+TEA+ZEN      | 5  | 1.67 | NIV+DON+3-AcDON +TEN+TEA+ZEN                              | 1 | 0.33 |
| DON+D <sub>3</sub> G+AOH+ZEN      | 2  | 0.67 | DON+15-AcDON +D <sub>3</sub> G+TEA+NEO+ZEN                | 1 | 0.33 |
| NIV+DON+D <sub>3</sub> G+ZEN      | 1  | 0.33 | DON+15-AcDON +D <sub>3</sub> G+FUS-X+TEA+ZEN              | 1 | 0.33 |
| DON+D <sub>3</sub> G+TEN+ZEN      | 1  | 0.33 | DON+15-AcDON +AOH+TEN+TEA+ZEN                             | 1 | 0.33 |
| ZEN+AOH+TEA+FUS-X                 | 1  | 0.33 | NIV+DON+D <sub>3</sub> G+FUS-X+TEA+ZEN                    | 1 | 0.33 |
| ZEN+AOH+TEA+D <sub>3</sub> G      | 2  | 0.67 | NIV+DON+3-AcDON +FUS-X+TEN+TEA                            | 1 | 0.33 |
| ZEN+AOH+TEA+DON                   | 2  | 0.67 | 7                                                         |   |      |
| ZEN+AOH+TEA+3-AcDON               | 1  | 0.33 | NIV+DON+D <sub>3</sub> G+FUS-X+TEN+TEA+ZEN                | 1 | 0.33 |
| ZEN+TEA+DON+FUS-X                 | 1  | 0.33 | NIV+DON+15-AcDON +3-AcDON +D <sub>3</sub> G+TEA+ZEN       | 1 | 0.33 |
| ZEN+TEA+15-AcDON+D <sub>3</sub> G | 1  | 0.33 | 8                                                         |   |      |
| NIV+DON+TEA+TEN                   | 7  | 2.34 | NIV+DON+15-AcDON +3-AcDON +D <sub>3</sub> G+FUS-X+TEN+TEA | 1 | 0.33 |

**Table S2.** The nonneoplastic and neoplastic effects through wheat flours consumption based on various margin of exposure estimation values of OTA.

| Wheat Flours                                      | $PDI$<br>$\mu\text{g}\cdot\text{kg}^{-1}\text{ bw}\cdot\text{day}^{-1}$ | nonneoplastic_BMDL10 / $PDI$ | neoplastic_BMDL10 / $PDI$ |
|---------------------------------------------------|-------------------------------------------------------------------------|------------------------------|---------------------------|
| The upper bound deterministic estimation          |                                                                         |                              |                           |
| Total population                                  | $4.64 \times 10^{-4}$                                                   | 10,198.60                    | 31,264.20                 |
| Adult men                                         | $4.93 \times 10^{-4}$                                                   | 9587.59                      | 29,391.14                 |
| Total population                                  | $4.33 \times 10^{-4}$                                                   | 10,931.11                    | 33,509.75                 |
| 7–10-year-old boys                                | $8.34 \times 10^{-4}$                                                   | 5671.90                      | 17,387.45                 |
| 7–10-year-old girls                               | $7.28 \times 10^{-4}$                                                   | 6494.72                      | 19,909.81                 |
| The upper bound probabilistic estimation (Median) |                                                                         |                              |                           |
| Total population                                  | $4.58 \times 10^{-4}$                                                   | 10,318.72                    | 31,632.45                 |
| Adult men                                         | $4.88 \times 10^{-4}$                                                   | 9700.57                      | 29,737.49                 |
| Total population                                  | $4.28 \times 10^{-4}$                                                   | 11,059.93                    | 33,904.65                 |
| 7–10-year-old boys                                | $8.24 \times 10^{-4}$                                                   | 5738.69                      | 17,592.18                 |
| 7–10-year-old girls                               | $7.20 \times 10^{-4}$                                                   | 6571.18                      | 20,144.20                 |
| The upper bound probabilistic estimation (P90)    |                                                                         |                              |                           |
| Total population                                  | $4.67 \times 10^{-4}$                                                   | 10,126.74                    | 31,043.93                 |
| Adult men                                         | $4.97 \times 10^{-4}$                                                   | 9520.17                      | 29,184.45                 |
| Total population                                  | $4.36 \times 10^{-4}$                                                   | 10,854.10                    | 33,273.67                 |
| 7–10-year-old boys                                | $8.40 \times 10^{-4}$                                                   | 5631.96                      | 17,264.99                 |
| 7–10-year-old girls                               | $7.33 \times 10^{-4}$                                                   | 6448.97                      | 19,769.58                 |

**Table S3.** The approximate cumulative exposure risks of four main pollution patterns of mycotoxins co-occurring in real samples for the total population.

| Co-occurrence                    | C min | C max  | %TDI min      | %TDI max       |
|----------------------------------|-------|--------|---------------|----------------|
| DON+15-AcDON+TEA+TEN             | 15.10 | 317.94 | 2.07          | 43.06          |
| DON+TEA+TEN                      | 9.8   | 230.27 | 1.20          | 27.11          |
| NIV+DON+D <sub>3</sub> G+TEA+TEN | 86.81 | 370.82 | 12.41         | 48.83          |
| AOH+ZEN                          | 14.50 | 95.29  | <b>796.23</b> | <b>5302.32</b> |

**Table S4.** Retention time and MS parameters for the analysis of mycotoxins.

| Mycotoxin        | Molecular Weight | TR (min) | Molecular Ion                        | ESI              | Parent Ions<br>(m/z) | Product Ions<br>(m/z) | CE<br>(eV) |
|------------------|------------------|----------|--------------------------------------|------------------|----------------------|-----------------------|------------|
| NIV              | 312.31           | 2.95     | [M+CH <sub>3</sub> COO] <sup>-</sup> | ESI <sup>-</sup> | 371.00               | 281.00                | 18         |
|                  |                  |          |                                      |                  | 371.10               | 59.00                 | 10         |
| DON              | 296.32           | 3.30     | [M+CH <sub>3</sub> COO] <sup>-</sup> | ESI <sup>-</sup> | 355.00               | 265.00                | 17         |
|                  |                  |          |                                      |                  | 355.10               | 247.20                | 22         |
| 3-AcDON          | 338.35           | 4.06     | [M+CH <sub>3</sub> COO] <sup>-</sup> | ESI <sup>-</sup> | 397.00               | 307.16                | 16         |
|                  |                  |          |                                      |                  | 397.10               | 173.10                | 15         |
| 15-AcDON         | 338.35           | 4.10     | [M+NH <sub>4</sub> ] <sup>+</sup>    | ESI <sup>+</sup> | 356.10               | 321.00                | 13         |
|                  |                  |          |                                      |                  | 356.00               | 137.00                | 5          |
| D <sub>3</sub> G | 458.46           | 3.20     | [M+CH <sub>3</sub> COO] <sup>-</sup> | ESI <sup>-</sup> | 517.10               | 457.40                | 14         |
|                  |                  |          |                                      |                  | 517.00               | 427.40                | 22         |
| FUS-X            | 354.36           | 3.52     | [M+H] <sup>+</sup>                   | ESI <sup>+</sup> | 355.04               | 175.00                | 18         |
|                  |                  |          |                                      |                  | 355.03               | 137.00                | 17         |
| OTA              | 403.81           | 5.46     | [M+H] <sup>+</sup>                   | ESI <sup>+</sup> | 404.12               | 221.00                | 35         |
|                  |                  |          |                                      |                  | 404.11               | 105.10                | 18         |
| NEO              | 382.40           | 3.60     | [M+NH <sub>4</sub> ] <sup>+</sup>    | ESI <sup>+</sup> | 400.12               | 215.10                | 14         |
|                  |                  |          |                                      |                  | 400.10               | 185.10                | 16         |
| ZEN              | 318.36           | 6.91     | [M-H] <sup>-</sup>                   | ESI <sup>-</sup> | 317.11               | 175.03                | 25         |
|                  |                  |          |                                      |                  | 317.12               | 131.02                | 31         |
| AOH              | 258.23           | 5.70     | [M+H] <sup>+</sup>                   | ESI <sup>+</sup> | 259.10               | 185.14                | 30         |
|                  |                  |          |                                      |                  | 259.11               | 128.13                | 49         |
| TEA              | 197.23           | 3.32     | [M+H] <sup>+</sup>                   | ESI <sup>+</sup> | 198.12               | 139.12                | 14         |
|                  |                  |          |                                      |                  | 198.11               | 125.11                | 15         |
| TEN              | 414.50           | 6.10     | [M+H] <sup>+</sup>                   | ESI <sup>+</sup> | 415.30               | 312.23                | 18         |
|                  |                  |          |                                      |                  | 415.31               | 256.23                | 25         |
| FB <sub>1</sub>  | 721.83           | 5.10     | [M+H] <sup>+</sup>                   | ESI <sup>+</sup> | 722.12               | 352.00                | 36         |
|                  |                  |          |                                      |                  | 722.11               | 334.00                | 45         |

TR: retention time    CE: collision energy

**Table S5.** The average daily intake of wheat and wheat-based products in Shanghai and participants for average body weight.

| Area                | Bw (kg) | Daily intake (g·day <sup>-1</sup> ) |
|---------------------|---------|-------------------------------------|
| Total population    | 58.20   | 83.37                               |
| Adult men           | 62.70   | 95.54                               |
| Adult women         | 54.00   | 72.17                               |
| 7-10-year-old boys  | 38.30   | 98.65                               |
| 7-10-year-old girls | 33.40   | 75.13                               |

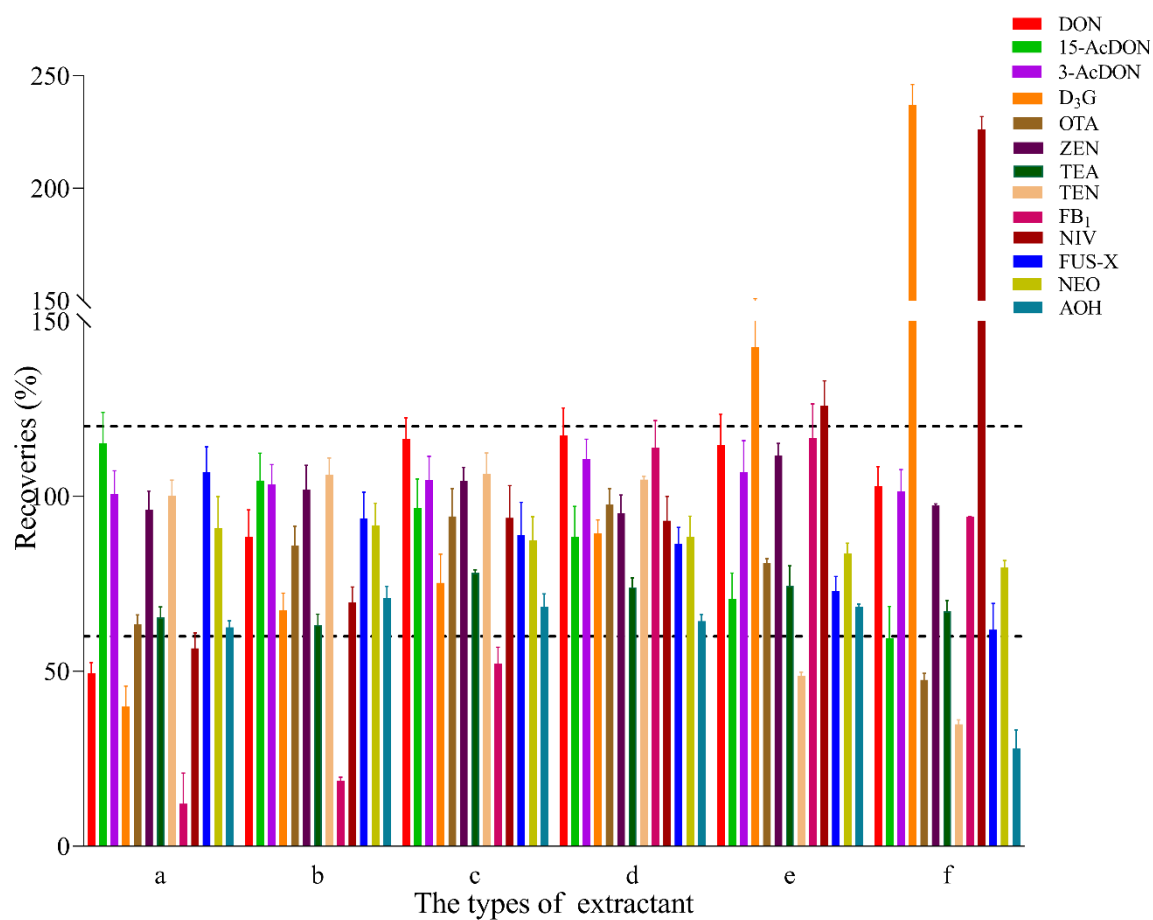

**Figure S1.** The effect of the extractant types containing 1% formic acid on the recoveries of mycotoxins: (a) 45% Acetonitrile, (b) 55% Acetonitrile, (c) 65% Acetonitrile, (d) 75% Acetonitrile, (e) 85% Acetonitrile, (f) 95% Acetonitrile. The two dashed lines represent recoveries of 60% and 120%, respectively.

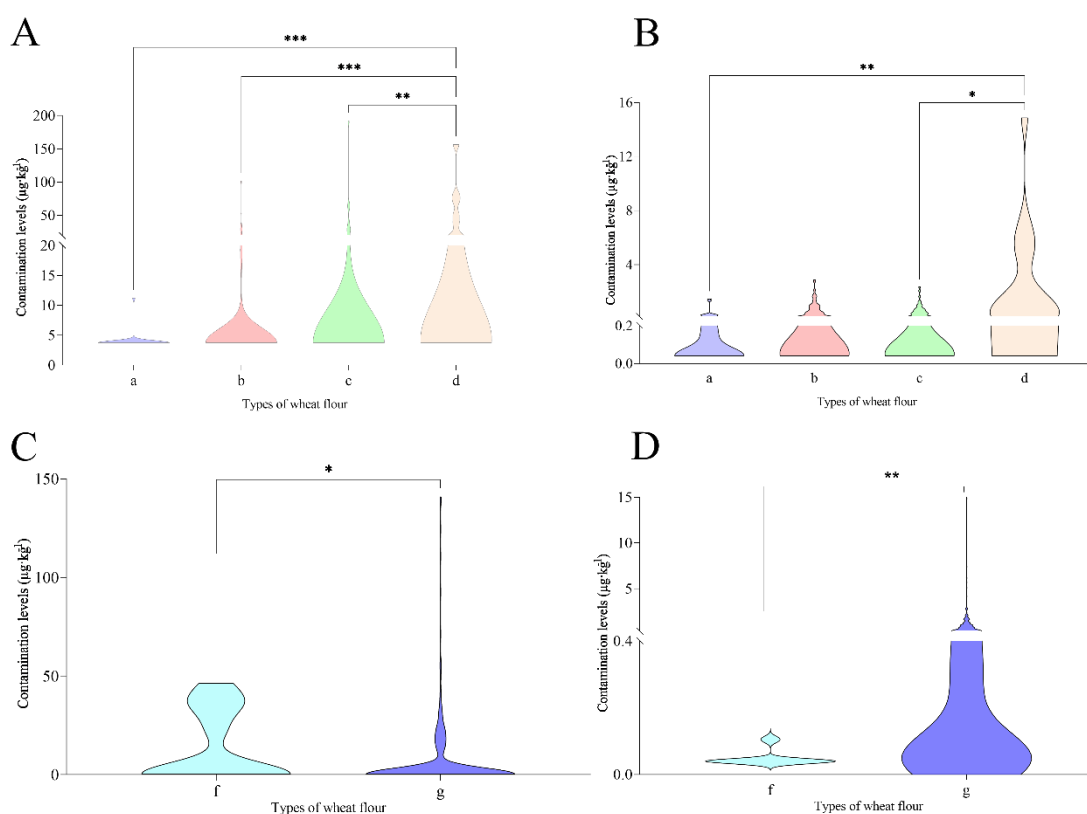

**Figure S2.** The distribution characteristics and differences of contamination levels for mycotoxins in various types of wheat flour samples: (A) occurrence of FUS-X in different wheat flour samples; (a) low-gluten wheat flours, (b) medium-gluten wheat flours, (c) high-gluten wheat flours, (d) whole wheat flours; (B) occurrence of TEN in different wheat flour samples; (a) low-gluten wheat flours, (b) medium-gluten wheat flours, (c) high-gluten wheat flours, (d) whole wheat flours; (C) occurrence of AOH in different wheat flour samples; (f) organic wheat flours, (g) conventional wheat flours; (D) occurrence of TEN in different wheat flour samples; (f) organic wheat flours, (g) conventional wheat flours.

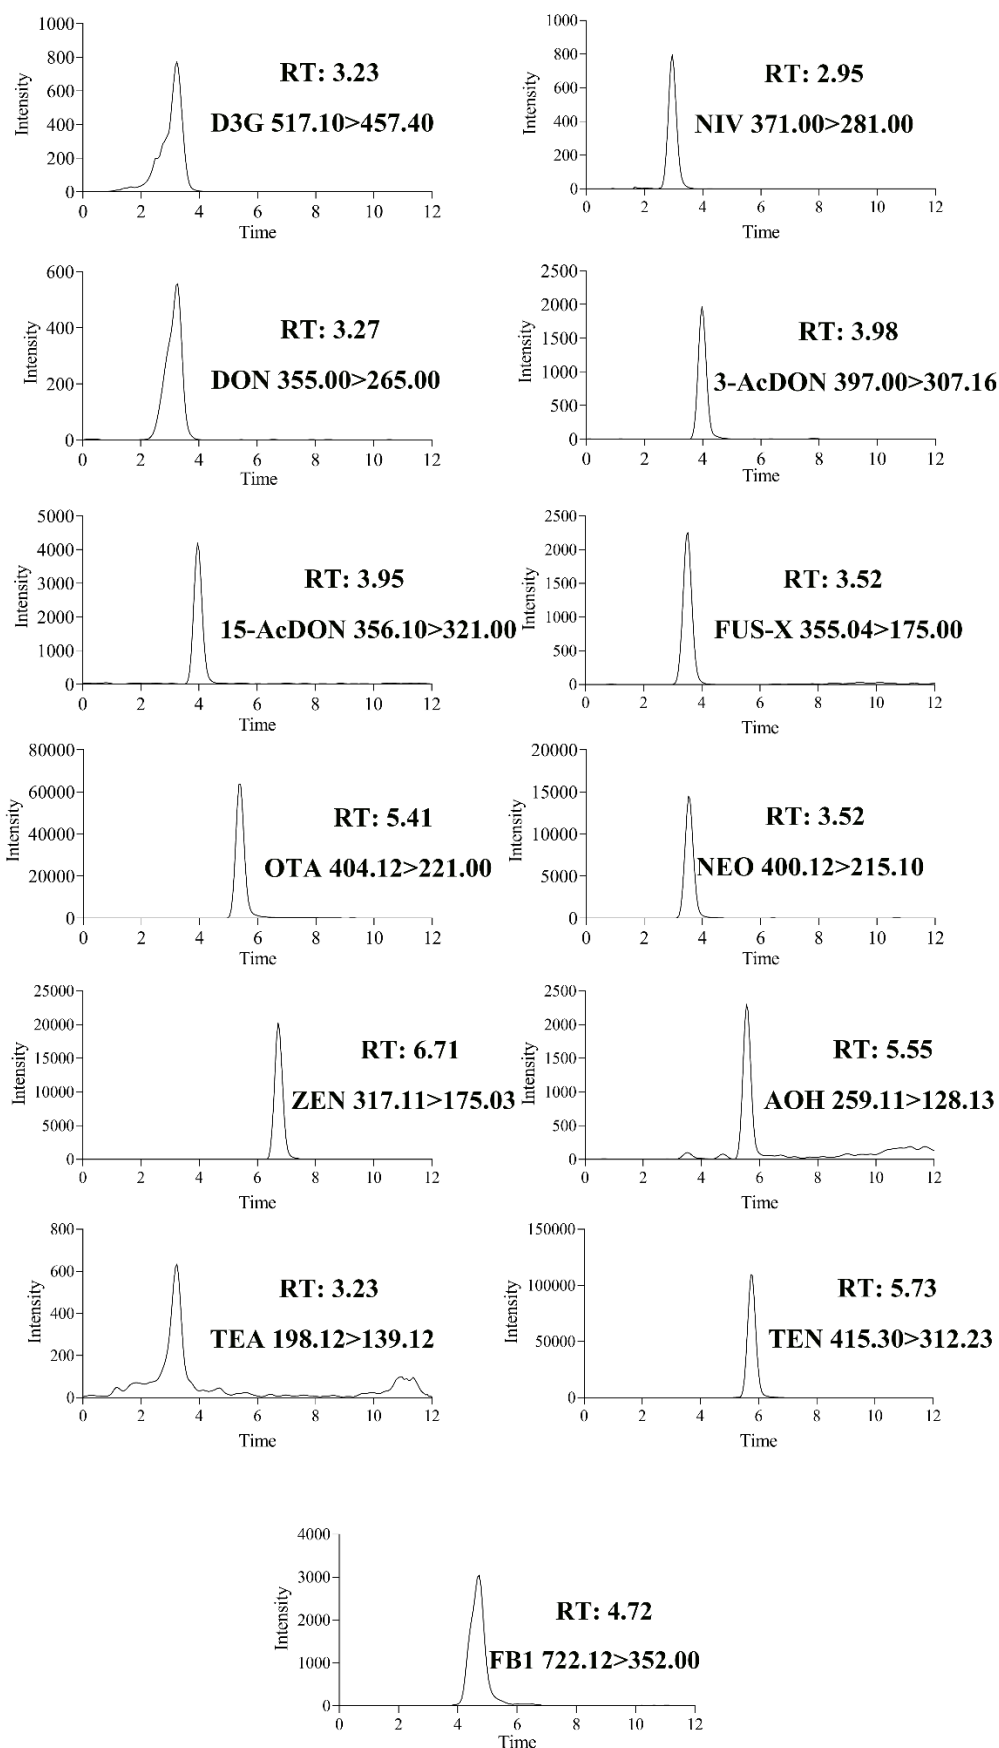

**Figure S3.** The chromatograms of 13 mycotoxins at middle concentration under optimized chromatographic and mass spectrometry conditions.
